# Supplementary material
Source: Elsevier journal article supplement (https://www.sciencedirect.com/science/article/pii/S0021755720302473)
Supplement: mmc1 [file S0021755720302473:mmc1.docx]

JPED-D-20-00216 – Supplementary Material

**Supplementary Material 1 - Ultrasonographic assessment of left internal jugular vein performed during the abdominal compression maneuver. A progressive increase in the cross-sectional area occurs as abdominal pressure increases.**


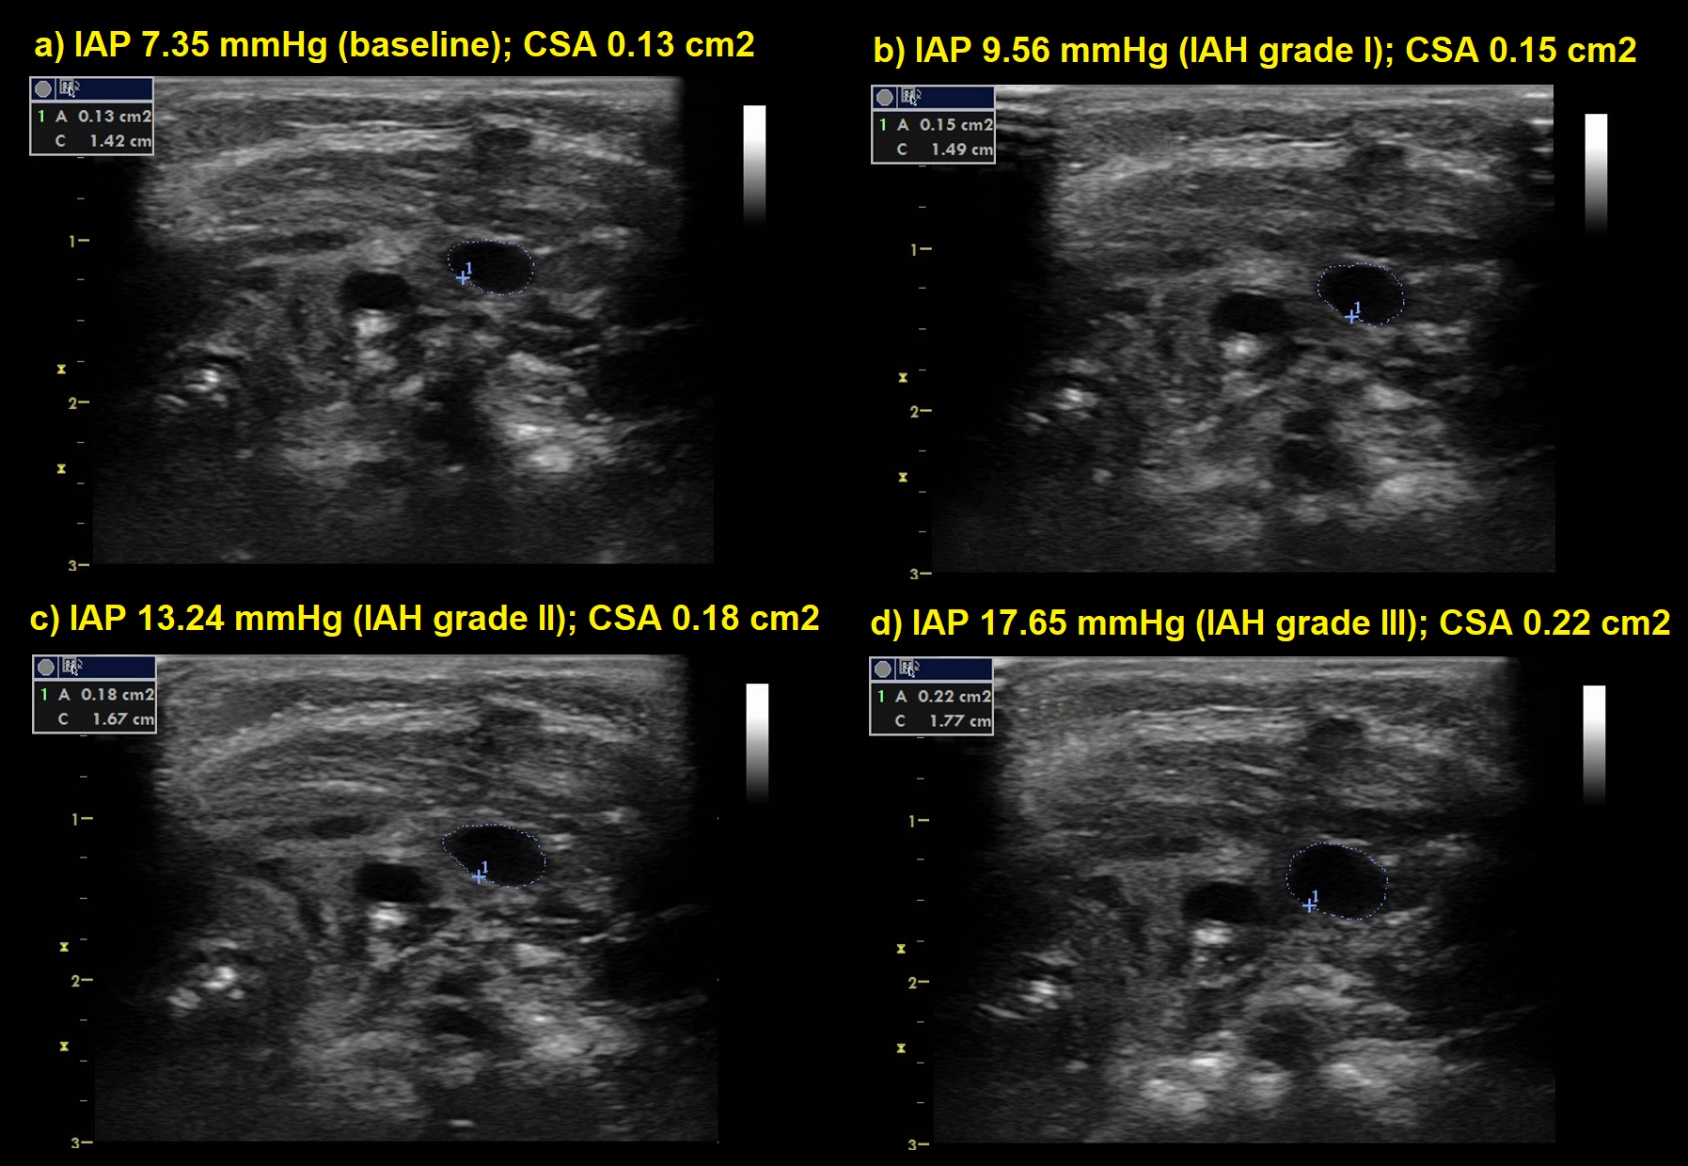


IAP, intra-abdominal pressure; IAH, intra-abdominal hypertension; CSA, cross-sectional area.

**Supplementary Material 2 - Main studies that have evaluated the influence of intra-abdominal pressure on cardiac index.**

| **Study** | **n** | **Agea** | **IAP (mmHg)** | **Hemodynamic changes** |
| --- | --- | --- | --- | --- |
| Sakka et al.24 | 8 | 3.5 ± 1.3 years | 12 | 13% reduction in CI |
| Kardos et al.25 | 30 | 13 ±2.3 years | 12-13 | 25% reduction in CI |
| Gueugniaud et al.26 | 12 | 23 ± 5 months | 10 | 33% reduction in SVI |
| De Waal et al.21 | 13 | 20 ± 9 months | 5 | 22% increase in CI |

IPA, intra-abdominal pressure; CI, cardiac index; SVI, stroke volume index.

a Data expressed as mean and standard deviation.
